# Supplementary material for: Analytical modeling framework for performance degradation of PEM fuel cells during startup–shutdown cycles
Source: Royal Society of Chemistry journal article supplement (doi:10.1039/c9ra09572a), 2020-01-01
Supplement: c9ra09572a1.pdf [file c9ra09572a1.pdf]

Supporting Information

**Coupled carbon corrosion-catalyst layer agglomeration  
modeling framework for performance degradation of  
proton exchange membrane fuel cell during startup-  
shutdown cycles**

Yunqi Li <sup>a, b</sup>, Xiran Chen<sup>a, b</sup>, Yuwei Liu<sup>a, b</sup>, Danping Xiong<sup>a, b</sup>, Jing Li<sup>a, b</sup>, Sha Yin<sup>a, b</sup>,  
Liang Chen<sup>c, d</sup>, Congxin Li<sup>c, d</sup>, Jun Xu<sup>e, f1</sup>

*<sup>a</sup>Department of Automotive Engineering, School of Transportation Science and  
Engineering, Beihang University, Beijing, China, 100191*

*<sup>b</sup>Vehicle Energy & Safety Laboratory (VESL), Beihang University, Beijing, China, 100191*

*<sup>c</sup>State Key Laboratory of Electric Vehicles, Beijing Institute of Technology, Collaborative  
Innovation Center for Electric Vehicles, Beijing 100081, China*

*<sup>d</sup>Beijing Automotive Research Center Co. Ltd, Beijing 101300, China*

*<sup>e</sup>Department of Mechanical Engineering and Engineering Science, The University of North  
Carolina at Charlotte, Charlotte, NC 28223, United States*

*<sup>f</sup>North Carolina Motorsports and Automotive Research Center, The University of North  
Carolina at Charlotte, Charlotte, NC 28223, United States*

---

<sup>1</sup> Corresponding author: Prof. Jun Xu, Email: [jun.xu@uncc.edu](mailto:jun.xu@uncc.edu); Tel: +1-(704)-687-8240, Fax: +1-(704)-687-8240

## Volume fraction of components in the catalyst layer and effective diffusion coefficient of oxygen

In general, the CL is composed of three components: void space, ionomer phase, and solid phase. Obviously, the following equation is given:

$$\varepsilon_{cl} + L_1 + L_{Pt/C} = 1 \quad [S1]$$

in which  $L_{Pt/C}$  is presented as

$$L_{Pt/C} = \frac{1}{t_{cl}} \left( \frac{m_{Pt}}{\rho_{Pt}} + \frac{m_C}{\rho_C} \right) \quad [S2]$$

$L_i$  can be expressed as

$$L_i = \frac{4}{3} \pi \left[ r_{agg}^3 L_{1,agg} + \left( (r_{agg} + \delta_{agg})^3 - r_{agg}^3 \right) \right] \cdot n / V_{tot} \quad [S3]$$

where  $n$  and  $V_{tot}$  are defined as the number of agglomerate particles and volume of the whole CL, respectively.  $n$  can be written as

$$\begin{aligned} n &= \frac{V_{Pt/C}}{(V_{Pt/C})_{agg}} \\ &= \frac{V_{tot} L_{Pt/C}}{\frac{4}{3} \pi r_{agg}^3 (1 - L_{1,agg})} \end{aligned} \quad [S4]$$

where  $(V_{Pt/C})_{agg}$  and  $V_{Pt/C}$  are the volume of solid phase in a single agglomerate and in the whole CL, respectively. Combining Eqs. S3 and S4,  $L_i$  can be written as

$$L_i = \frac{L_{Pt/C}}{r_{agg}^3 (1 - L_{1,agg})} \left[ r_{agg}^3 L_{1,agg} + \left( (r_{agg} + \delta_{agg})^3 - r_{agg}^3 \right) \right] \quad [S5]$$

The oxygen reaches the reaction sites through two routes: ionomer phase and void space. Therefore, the effective coefficient of oxygen diffusion can be described using the effective diffusion coefficient of oxygen in ionomer phase and liquid water:<sup>1</sup>

$$D_{O_2}^{eff} = \frac{L_1}{L_1 + \varepsilon_{cl}} D_{O_2,i}^{eff} + \frac{\varepsilon_{cl}}{L_1 + \varepsilon_{cl}} D_{O_2,w}^{eff} \quad [S6]$$

where  $D_{O_2,i}^{eff}$  and  $D_{O_2,w}^{eff}$  are expressed as follows:

$$D_{O_2,i}^{\text{eff}} = L_1^{1.5} D_{O_2,i} \quad [\text{S7}]$$

$$D_{O_2,w}^{\text{eff}} = \varepsilon_{\text{cl}}^{1.5} D_{O_2,w} \quad [\text{S8}]$$

## Tables of parameter values used in the model

In the carbon corrosion model, all rate constants are assumed to have an Arrhenius dependence on temperature and can be expressed as

$$k_i = k_i^0 \exp(-E_a / RT) \quad [\text{S9}]$$

where  $k_i$  and  $k_i^0$  ( $i = 1, 2, \dots, 7$ ) are the rate constant and pre-exponential rate constant of each reaction, respectively. The kinetic parameters used in the carbon corrosion model are given as follows:

**Table S1 Kinetic parameters of each reaction in the carbon corrosion model**

| Parameter | $k^0$                                                | $U$  | $\alpha_a$ | $\alpha_c$ | $E_a$                                                 |
|-----------|------------------------------------------------------|------|------------|------------|-------------------------------------------------------|
| $r_1$     | $2.35 \times 10^{-12}$                               | 1.00 | 0.35       | N/A        | 10                                                    |
| $r_2$     | 95                                                   | 0.15 | 0.65       | N/A        | 110                                                   |
| $r_3$     | $2.19 \times 10^{-3}$                                | 0.95 | 0.48       | 0.65       | 50                                                    |
| $r_4$     | $1.18 \times 10^{-8}$                                | 1.09 | 0.5        | N/A        | 10                                                    |
| $r_5$     | $4.22 \times 10^{-14}$                               | 1.00 | 0.5        | N/A        | 10                                                    |
| $r_6$     | $2.35 \times 10^{-7}$                                | 1.00 | 0.5        | N/A        | 10                                                    |
| $r_7$     | $6.00 \times 10^{-4}$                                | 0.57 | 0.5        | 0.5        | 20                                                    |
| Units     | $\text{mol} \cdot \text{m}^{-2} \cdot \text{s}^{-1}$ | V    | 1          | 1          | $\text{kJ} \cdot \text{mol}^{-1} \cdot \text{K}^{-1}$ |

The values of more parameters used in the carbon corrosion model and the agglomerate model of CL are given in **Table S2**.

**Table S2 Basic parameters used in the modeling framework**

| Parameters                                  | Symbols                | Value/unit                                                                              | Ref.   |
|---------------------------------------------|------------------------|-----------------------------------------------------------------------------------------|--------|
| Temperature                                 | $T$                    | 353.15 K                                                                                | 2      |
| Pressure                                    | $P$                    | 1 atm                                                                                   | 2      |
| Mole fraction of oxygen in the cathode side | $\chi_{O_2}$           | 0.21                                                                                    | 2      |
| Mole fraction of hydrogen in the anode side | $\chi_{H_2}$           | 1                                                                                       | 2      |
| CL thickness                                | $t_{cl}$               | 10 $\mu\text{m}$                                                                        | 2      |
| Density of platinum                         | $\rho_{Pt}$            | 21450 $\text{kg}\cdot\text{m}^{-3}$                                                     | –      |
| Density of carbon                           | $\rho_C$               | 1800 $\text{kg}\cdot\text{m}^{-3}$                                                      | –      |
| Platinum loading                            | $m_{Pt}$               | 0.2 $\text{mg}\cdot\text{cm}^{-2}$                                                      | 2      |
| Carbon loading                              | $m_C$                  | 0.3 $\text{mg}\cdot\text{cm}^{-2}$                                                      | 2      |
| Cathodic transfer coefficient               | $\alpha_c$             | 1                                                                                       | 3      |
| Anodic transfer coefficient                 | $\alpha_a$             | 0.5                                                                                     | 3      |
| Effective Pt surface ratio                  | $\varepsilon_l$        | 0.85                                                                                    | –      |
| Electronic conductivity                     | $\kappa_s$             | 72700 $\text{S}\cdot\text{m}^{-1}$                                                      | 3      |
| Ohmic resistance                            | $R_{Ohm}$              | $6.4\times 10^{-6} \Omega\cdot\text{m}^2$                                               | 4      |
| ECSA of pristine CL                         | $(\text{ECSA})_0$      | 59 $\text{m}^2\cdot\text{g}^{-1}$                                                       | 2      |
| Initial radius of the agglomerate           | $r_{0,agg}$            | 0.3 $\mu\text{m}$                                                                       | Fitted |
| Initial thickness of ionomer covering film  | $\delta_{0,agg}$       | 3 nm                                                                                    | Fitted |
| Initial radius of Pt particles              | $r_{0,Pt}$             | 2 nm                                                                                    | 2      |
| Reference exchange current density          | $i_0^{\text{ref}}$     | $10^{0.03417T-16.96} \text{mA}\cdot\text{cm}^{-2}$                                      | 3      |
| Reference oxygen concentration              | $C_{O_2}^{\text{eff}}$ | 0.8 $\text{mol}\cdot\text{m}^{-3}$                                                      | –      |
| Henry's constant of oxygen in the ionomer   | $H_{O_2,i}$            | 0.3125 $\text{atm}\cdot\text{m}^3\cdot\text{mol}^{-1}$                                  | 3      |
| Henry's constant of oxygen in the water     | $H_{O_2,w}$            | $1.33\exp(-666/T)$                                                                      | 3      |
| Pt diffusion coefficient in the ionomer     | $D_{Pt,i}$             | $1.0\times 10^{-12} \text{m}^2\cdot\text{s}^{-1}$                                       | Fitted |
| Oxygen diffusion coefficient in ionomer     | $D_{O_2,i}$            | $1.4276\times 10^{-11}\times T-$<br>$4.2185\times 10^{-9} \text{m}^2\cdot\text{s}^{-1}$ | 3      |

|                                     |              |                                           |        |
|-------------------------------------|--------------|-------------------------------------------|--------|
| Surface energy density of Pt        | $\gamma$     | 2.37 J·m <sup>-2</sup>                    | 5      |
| Molar volume of Pt                  | $\Omega$     | 9.27 m <sup>3</sup> ·mol <sup>-1</sup>    | 6      |
| Ionomer fraction in an agglomerate  | $L_{i,agg}$  | 0.45                                      | –      |
| Partial pressure of water vapors    | $p_0$        | 47 kPa                                    | –      |
| Concentration of protons            | $c_+$        | 1 mol·L <sup>-1</sup>                     | –      |
| Frumkin factor                      | $g$          | 3                                         | 7      |
| BET surface area                    | $S_{BET}$    | 250 m <sup>2</sup> ·g <sup>-1</sup>       | 2      |
| Surface concentration of site #     | [#]          | 5.89×10 <sup>-6</sup> mol·m <sup>-2</sup> | Fitted |
| Surface concentration of site *     | [*]          | 1×10 <sup>-4</sup> mol·m <sup>-2</sup>    | 7      |
| Molar mass of water                 | $M_{H_2O}$   | 18 g·mol <sup>-1</sup>                    | –      |
| Molar mass of carbon                | $M_C$        | 12 g·mol <sup>-1</sup>                    | –      |
| Viscosity of water at 80 °C         | $\mu_{H_2O}$ | 0.3565 mPa·s                              | –      |
| Molar volume of oxygen              | $V_{O_2}$    | 25.6 cm <sup>3</sup> ·mol <sup>-1</sup>   | –      |
| Association parameter for the water | $\Psi$       | 2.26                                      | 1      |

### List of Symbols

|           |                                                                            |
|-----------|----------------------------------------------------------------------------|
| $a_{eff}$ | Effective catalyst surface area per unit volume, m <sup>-1</sup>           |
| $a_{agg}$ | Effective agglomerate surface area per unit volume, m <sup>-1</sup>        |
| $c_+$     | Concentration of protons, mol·L <sup>-1</sup>                              |
| $C_{O_2}$ | Oxygen concentration, mol·m <sup>-3</sup>                                  |
| $C_{Pt}$  | Equilibrium concentration of solute Pt <sup>2+</sup> , mol·m <sup>-3</sup> |
| $D_{O_2}$ | Oxygen diffusion coefficient, m <sup>2</sup> ·s <sup>-1</sup>              |
| $E_a$     | Activation energy, J·mol <sup>-1</sup>                                     |
| $E_r$     | Agglomerate effectiveness factor                                           |
| $E_{rev}$ | Reversible potential of the reaction of hydrogen and oxygen, V             |
| $F$       | Faraday's constant, 96485 C·mol <sup>-1</sup>                              |

|                    |                                                                                                       |
|--------------------|-------------------------------------------------------------------------------------------------------|
| $H_{O_2, i}$       | Henry's constant of oxygen in ionomer, $\text{atm}\cdot\text{m}^3\cdot\text{mol}^{-1}$                |
| $H_{O_2, w}$       | Henry's constant of oxygen in water, $\text{atm}\cdot\text{m}^3\cdot\text{mol}^{-1}$                  |
| $i$                | Current density, $\text{mA}\cdot\text{cm}^{-2}$                                                       |
| $i_0^{\text{ref}}$ | Reference exchange current density, $\text{mA}\cdot\text{cm}^{-2}$                                    |
| $I_{\text{tot}}$   | Total current density, $\text{mA}\cdot\text{cm}^{-2}$                                                 |
| $k_c$              | Electrochemical reaction rate constant                                                                |
| $L_i$              | Volume fraction of ionomer phase in CL                                                                |
| $L_{i,\text{agg}}$ | Volume fraction of ionomer phase in the agglomerate                                                   |
| $L_{\text{PvC}}$   | Volume fraction of solid phase in CL                                                                  |
| $m$                | Mass loading per unit cross-sectional area, $\text{kg}\cdot\text{m}^{-2}$                             |
| $M$                | Molar mass, $\text{kg}\cdot\text{mol}^{-1}$                                                           |
| $n$                | Total number of agglomerates                                                                          |
| $N_C$              | Number of moles of carbon per unit cross-sectional area, $\text{mol}\cdot\text{m}^{-2}$               |
| $N_{O_2}$          | Oxygen mole flux, $\text{mol}\cdot\text{m}^{-2}\cdot\text{s}^{-1}$                                    |
| $N'_{O_2}$         | Oxygen mole flux in ionomer film, $\text{mol}\cdot\text{m}^{-2}\cdot\text{s}^{-1}$                    |
| $p_0$              | Partial pressure of water vapors, atm                                                                 |
| $P$                | Gas pressure, atm                                                                                     |
| $r_{\text{agg}}$   | Radius of an agglomerate, m                                                                           |
| $r_{0,\text{Pt}}$  | Initial radius of Pt particles, m                                                                     |
| $r_{t,\text{Pt}}$  | Radius of degraded Pt particles, m                                                                    |
| $R$                | Universal gas constant, $8.314\text{ J}\cdot\text{mol}^{-1}\cdot\text{K}^{-1}$                        |
| $R_{\text{agg}}$   | Oxygen consumption rate based on agglomerate volume, $\text{mol}\cdot\text{m}^{-3}\cdot\text{s}^{-1}$ |
| $R_{O_2}$          | Oxygen consumption rate based on catalyst volume, $\text{mol}\cdot\text{m}^{-3}\cdot\text{s}^{-1}$    |
| $R_{\text{Ohm}}$   | Ohmic resistance, $\Omega\cdot\text{m}^2$                                                             |
| $S_{\text{ac}}$    | Actual platinum surface area per mass, $\text{m}^2\cdot\text{kg}^{-1}$                                |
| $t_{\text{cl}}$    | Thickness of catalyst layer, m                                                                        |
| $V_{\text{ave}}$   | Average value of cyclic voltage, V                                                                    |
| $V_{O_2}$          | Molar volume of oxygen, $\text{m}^3\cdot\text{mol}^{-1}$                                              |

## Greek

|                    |                                                       |
|--------------------|-------------------------------------------------------|
| $\alpha_a$         | Anodic transfer coefficient                           |
| $\alpha_c$         | Cathodic transfer coefficient                         |
| $\delta_{agg}$     | Thickness of ionomer covering film, m                 |
| $\eta_{local}$     | Local overpotential within the CL, V                  |
| $\varepsilon_l$    | Effective Pt surface ratio                            |
| $\varepsilon_{cl}$ | Catalyst layer porosity                               |
| $\lambda$          | Local water content of the ionomer phase              |
| $\theta$           | Fraction of coverage                                  |
| $\kappa_l$         | Bulk protonic conductivity, S·m <sup>-1</sup>         |
| $\kappa_s$         | Bulk electronic conductivity, S·m <sup>-1</sup>       |
| $\gamma$           | Interfacial energy surface density, J·m <sup>-2</sup> |
| $\Omega$           | Molar volume of Pt, m <sup>3</sup> ·mol <sup>-1</sup> |
| $\rho$             | Density, kg·m <sup>-3</sup>                           |
| $\mu$              | Viscosity, m·Pa·s                                     |
| $\chi$             | Mole fraction                                         |
| $\phi_L$           | Thiele modulus                                        |

## Subscripts and superscripts

|     |                |
|-----|----------------|
| agg | Agglomerate    |
| ave | Average        |
| C   | Carbon         |
| cl  | Catalyst layer |
| eff | Effective      |
| g   | Gas            |
| i   | Ionomer        |
| max | Maximum        |
| min | Minimum        |
| Pt  | Platinum       |

|     |            |
|-----|------------|
| ref | Reference  |
| rev | Reversible |
| s   | Solid      |
| w   | Water      |

## references

- 1 M. Moein-Jahromi and M. J. Kermani, *Int. J. Hydrog. Energy*, 2012, **37**, 17954. O. H. Kim, Y. H. Cho, S. H. Kang, H. Y. Park, M. Kim, J. W. Lim, D. Y. Chung, M. J. Lee, H. Choe and Y. E. Sung, *Nat. Commun.*, 2013, **4**, 2473.
- 2 N. Macauley, D. D. Papadias, J. Fairweather, D. Spornjak, D. Langlois, R. Ahluwalia, K. L. More, R. Mukundan and R. L. Borup, *J. Electrochem. Soc.*, 2018, **165**, F3148.
- 3 N. Khajeh-Hosseini-Dalasm, M. J. Kermani, D. G. Moghaddam and J. M. Stockie, *Int. J. Hydrog. Energy*, 2010, **35**, 2417.
- 4 W. Bi and T. F. Fuller, *J. Electrochem. Soc.*, 2008, **155**, B215.
- 5 R. M. Darling and J. P. Meyers, *J. Electrochem. Soc.*, 2003, **150**, A1523.
- 6 Y. Shao-Horn, W. C. Sheng, S. Chen, P. J. Ferreira, E. F. Holby and D. Morgan, *Top. Catal.*, 2007, **46**, 285.
- 7 K. G. Gallagher and T. F. Fuller, *Phys. Chem. Chem. Phys.*, 2009, **11**, 11557.
